# Supplementary material for: iTRAQ-based quantitative proteome analysis reveals metabolic changes between a cleistogamous wheat mutant and its wild-type wheat counterpart
Source: PeerJ. 2019 Jun 17;7:e7104. doi: 10.7717/peerj.7104 (PMC6585907; doi:10.7717/peerj.7104)
Supplement: Supplemental Information 7 — Phase B (98% ACN, pH 10) was added at 5 minute in the high pH reverse phase separation gradient. In addition, at the beginning of injection, peaks will not appear immediately. Therefore, we will generally collect more time based on the peak shape. [file peerj-07-7104-s007.xlsx]

## Sheet: 工作表1
Table S2. Separation gradient of high pH reversed phase chromatography.
Time (min)	A (98% H2O, pH 10)	B (98% ACN, pH 10)	Speed（μL/min）
0	1	0	700
3	1	0	700
5	0.95	0.05	700
45	0.65	0.35	700
53	0.1	0.9	700
