# Supplementary material for: iTRAQ-based quantitative proteome analysis reveals metabolic changes between a cleistogamous wheat mutant and its wild-type wheat counterpart
Source: PeerJ. 2019 Jun 17;7:e7104. doi: 10.7717/peerj.7104 (PMC6585907; doi:10.7717/peerj.7104)
Supplement: Supplemental Information 8 — Each sample was separated using a nanoliter flow rate HPLC liquid phase system. The column is equilibrated with 95% A solution. The sample is loaded from the autosampler to the mass spectrometer precolumn and separated by the analytical column. [file peerj-07-7104-s008.xlsx]

## Sheet: 工作表1
Table S3. Elution gradient parameter in liquid chromatography.
Time (min)	A	B	Speed (nL/min)
	(0.1% FA, H2O)	(0.08% FA, 80% CAN)
0	0.97	0.03	300
4	0.92	0.08	300
77	0.7	0.3	300
87	0.1	0.9	300
90	0.1	0.9	300
