# Supplementary material for: iTRAQ-based quantitative proteome analysis reveals metabolic changes between a cleistogamous wheat mutant and its wild-type wheat counterpart
Source: PeerJ. 2019 Jun 17;7:e7104. doi: 10.7717/peerj.7104 (PMC6585907; doi:10.7717/peerj.7104)
Supplement: Supplemental Information 9 — The parameter was used to match the raw mass data to the UniProt Triticum database. False Discovery Rate (FDR) = N (decoy)*2/(N (decoy)+ N (target)) ≤ 0.01. [file peerj-07-7104-s009.xlsx]

## Sheet: Sheet1
Table S4. The parameter setting for database search.
Item	Value
Enzyme	Trypsin
Max Missed Cleavages	2
Fixed modifications	Carbamidomethyl (C)
Variable modifications	Oxidation (M),Acetyl (Protein N-term) iTRAQ8plex (N-term), iTRAQ8plex (K), iTRAQ8plex (Y)
Peptide Mass Tolerance	± 15 ppm
Fragment Mass Tolerance	20 mmu
peptide confidence	High
Quantification Experimental Bias	Normalize on Total peptide Amount
False Discovery Rate (FDR = N (decoy)*2/(N (decoy)+ N (target)) ≤ 0.01
