# Supplementary material for: iTRAQ-based quantitative proteome analysis reveals metabolic changes between a cleistogamous wheat mutant and its wild-type wheat counterpart
Source: PeerJ. 2019 Jun 17;7:e7104. doi: 10.7717/peerj.7104 (PMC6585907; doi:10.7717/peerj.7104)
Supplement: Supplemental Information 10 — The parameter was used to match the raw mass data to the UniProt Triticum database. False Discovery Rate (FDR) = N (decoy)*2/(N (decoy)+ N (target)) ≤ 0.01. [file peerj-07-7104-s010.xlsx]

## Sheet: Sheet1
Table S5. Primer sequences for qRT-PCR.
Primer Name	Forward Sequence (5’→3’)	Reverse Sequence (5’→3’)	Tm (°C)	Production Size (bp)
TaGAPDH	CCACTAACTGCCTTGCTCCTCTTG	CTTCCACCTCTCCAGTCCTTGCT	60	142
A0A1D6CCI3	AACAACAAGCGGCTGAAGAT	AGCAGCCGTTGAGGAAGTTA	60	250
A0A1D5WGA3	GTCTGCGTCGCCGACTACATATC	CTCGCCAGCCCACCATAGAAGA	60	113
A0A1D5RR02	TGGGTGGTGGAGGATATGGACAAA	GACGATGGTGTTGCCGAGGAAG	60	195
P93594	ATGACAGAGACGGCTACAGAACCA	AGCACTCAGCACCTGTTGGACTA	60	149
W5B5R3	GACAAGGAGGAGCAGGCAGAGT	CACCATTGCGGACACGGTTCAT	60	112
A0A1D5SYC3	CGTCACCTGATCTCAGAACAGTTGG	CGCTGAAGATTGTGTAGTGCTCGTA	60	249
A0A1D5VEI9	GGAGACGATTTCCACTTGCCTGAG	GCCAGCCAATGTGCCTACAGTATC	60	237
A0A1D5RVB4	CCTTGGACGGTGGGCTCTATGA	GCTTGGCAACCAGCGAAGAAGA	60	108
A0A1D5RRV7	CTCATTTCGTGTGTGCGTTT	AGGTGCTTAGGGAAGGTGCT	60	244
A0A1D5TN57	AATGTCCGCAAGGATTCAAG	GCTGATGCAAGTGTCATGCT	60	179
