# Supplementary material for: iTRAQ-based quantitative proteome analysis reveals metabolic changes between a cleistogamous wheat mutant and its wild-type wheat counterpart
Source: PeerJ. 2019 Jun 17;7:e7104. doi: 10.7717/peerj.7104 (PMC6585907; doi:10.7717/peerj.7104)
Supplement: Supplemental Information 11 — 1 pair of lodicule; 2 The results presented are the means of three independent experiments. Data are means ± SE. different lowercase letter indicate difference in means using the one-way ANOVA LSD analysis of PASW Statistics software among four flower development stage of YM18 (green lowercase) and ZK001 (red lowercase). Duncan’s tests (P < 0.05) were used to detect significant differences between means; * The asterisk indicates the difference between YM18 and ZK001 at WAS, GAS, YAS and AS, respectively. Duncan’s tests (P < 0.05) were used to detect significant differences between means. [file peerj-07-7104-s011.xlsx]

## Sheet: Sheet1
Table S6. Starch and soluble sugar content in lodicules of YM18 and ZK001 at four flower development stages.
Stage	Starch content in each pair of lodicules (µg/PL1)		Soluble sugar content in each pair of lodicules (μg/PL)
	YM18	ZK001	YM18	ZK001
WAS	0.49 ± 0.12a2	0.26 ± 0.03a	1.44 ± 0.17a	1.66 ± 0.45a
GAS	0.60 ± 0.06a	1.31 ± 0.51a	2.79 ± 0.36a	3.51 ± 0.14b
YAS	1.99 ± 0.22b	0.83 ± 0.12a (*)	7.11 ± 0.26b	4.07 ± 1.00b (*)
AS	3.00 ± 0.88b	10.70 ± 0.54b (*)	9.53 ± 1.25c	14.45 ± 0.79c (*)
1 pair of lodicule;
2 The results presented are the means of three independent experiments. Data are means ± SE. diﬀerent lowercase letter indicate diﬀerence in means using the one-way ANOVA LSD analysis of PASW Statistics software among four flower development stage of YM18 (green lowercase) and ZK001 (red lowercase). Duncan's tests (P < 0.05) were used to detect significant differences between means.
* The asterisk indicates the difference between YM18 and ZK001 at WAS, GAS, YAS and AS, respectively. Duncan's tests (P < 0.05) were used to detect significant differences between means.
