# Supplementary material for: iTRAQ-based quantitative proteome analysis reveals metabolic changes between a cleistogamous wheat mutant and its wild-type wheat counterpart
Source: PeerJ. 2019 Jun 17;7:e7104. doi: 10.7717/peerj.7104 (PMC6585907; doi:10.7717/peerj.7104)
Supplement: Supplemental Information 14 — The starch and total soluble sugars in the supernatant were determined using a UV-VIS Spectrophotometer (Lambda 365, PerkinElmer) with a wave length of 620 nm after extracting following the instructions included with the Starch Content and Plant Soluble Sugar Content test kits (Nanjing Jiancheng Bioengineering Institute). [file peerj-07-7104-s014.xlsx]

## Sheet: Sheet1
Table S9. Raw data of starch and total soluble suger contents.
	Standard	0.1716		PL:pair of lodicules
	Blank	0.0022
Weight of lodicules (g)	Samples	OD value	Starch content (μg/PL)
0.01	YM18-WAS-1	0.008	0.582054
0.01	YM18-WAS-2	0.0054	0.321133
0.02	YM18-WAS-3	0.0078	0.561983
0.02	YM18-GAS-1	0.009	0.682409
0.02	YM18-GAS-2	0.008	0.582054
0.02	YM18-GAS-3	0.0077	0.551948
0.05	YM18-YAS-1	0.0238	2.16765
0.03	YM18-YAS-2	0.019	1.68595
0.03	YM18-YAS-3	0.0233	2.11747
0.05	YM18-AS-1	0.0202	1.80638
0.02	YM18-AS-2	0.0409	3.88371
0.04	YM18-AS-3	0.0354	3.33176
0.01	ZK001-WAS-1	0.005	0.280992
0.02	ZK001-WAS-2	0.003	0.0802834
0.02	ZK001-WAS-3	0.0045	0.230815
0.03	ZK001-GAS-1	0.0224	2.02715
0.02	ZK001-GAS-2	0.0122	1.00354
0.02	ZK001-GAS-3	0.0111	0.893152
0.03	ZK001-YAS-1	0.0112	0.903188
0.04	ZK001-YAS-2	0.0115	0.933294
0.03	ZK001-YAS-3	0.0088	0.662338
0.05	ZK001-AS-1	0.0693	6.73377
0.04	ZK001-AS-2	0.1142	11.2397
0.04	ZK001-AS-3	0.1035	10.1659
Total soluble sugar
	Standard	0.0369
	Blank	0.0025
Weight of lodicules (g)	Samples	OD value	Total soluble sugar content (μg/PL)
0.01	YM18-WAS-1	0.0943	1.3343
0.01	YM18-WAS-2	0.0924	1.30669
0.02	YM18-WAS-3	0.1179	1.67733
0.02	YM18-GAS-1	0.1598	2.28634
0.02	YM18-GAS-2	0.213	3.05959
0.02	YM18-GAS-3	0.2106	3.02471
0.05	YM18-YAS-1	0.4797	6.93605
0.03	YM18-YAS-2	0.5173	7.48256
0.03	YM18-YAS-3	0.4789	6.92442
0.05	YM18-AS-1	0.5452	7.88808
0.02	YM18-AS-2	0.7528	10.9055
0.04	YM18-AS-3	0.6759	9.78779
0.01	ZK001-WAS-1	0.1014	1.4375
0.02	ZK001-WAS-2	0.0895	1.26453
0.02	ZK001-WAS-3	0.1596	2.28343
0.03	ZK001-GAS-1	0.232	3.33576
0.02	ZK001-GAS-2	0.2437	3.50581
0.02	ZK001-GAS-3	0.2563	3.68895
0.03	ZK001-YAS-1	0.3282	4.73401
0.04	ZK001-YAS-2	0.3333	4.80814
0.03	ZK001-YAS-3	0.1852	2.65552
0.05	ZK001-AS-1	0.9213	13.3547
0.04	ZK001-AS-2	1.0217	14.814
0.04	ZK001-AS-3	1.048	15.1962
